# Supplementary material
Source: PubMed Central journal article supplement (PMC535104)

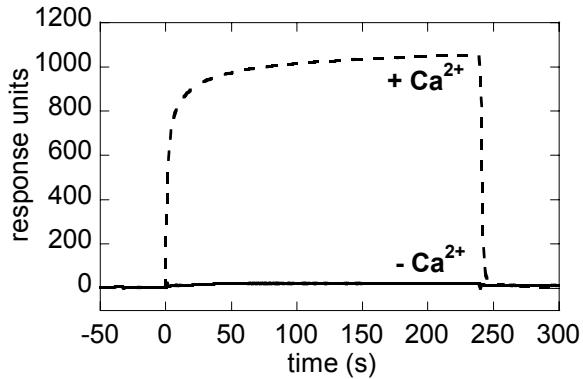

Supplement: pnas_101_50_17404__2.pdf [file pnas_101_50_17404__2.pdf]

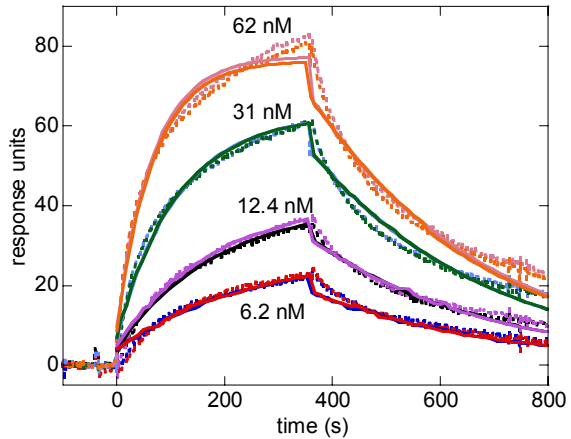

Supplement: pnas_101_50_17404__3.pdf [file pnas_101_50_17404__3.pdf]

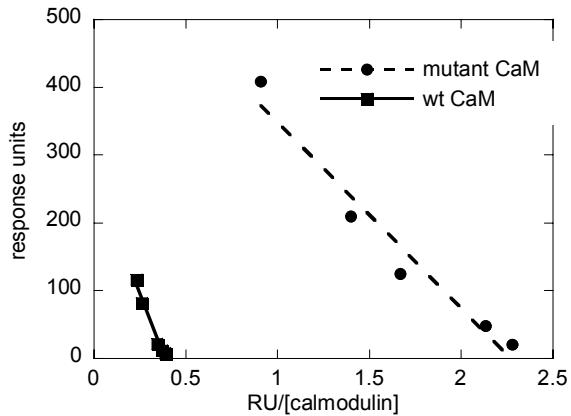

Supplement: pnas_101_50_17404__4.pdf [file pnas_101_50_17404__4.pdf]

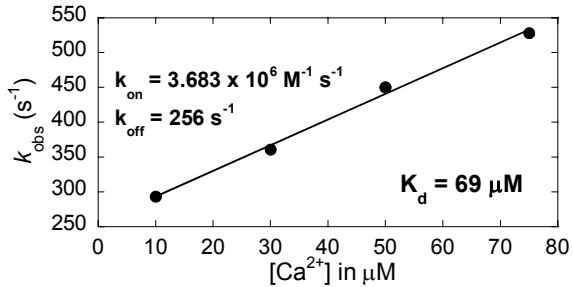

Supplement: pnas_101_50_17404__5.pdf [file pnas_101_50_17404__5.pdf]

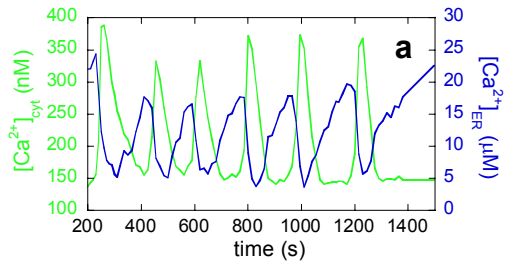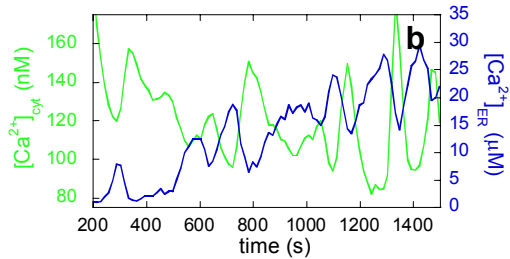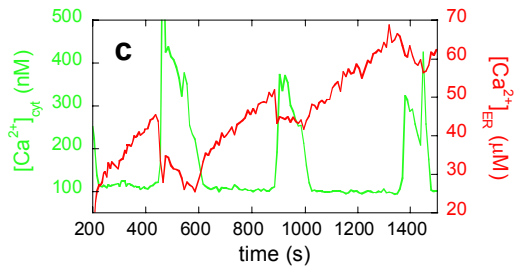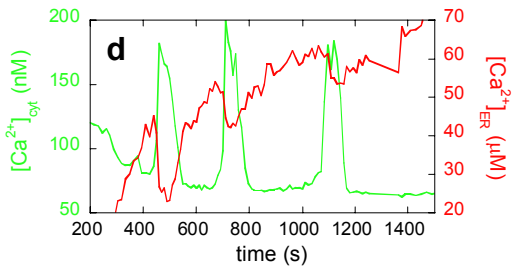

Supplement: pnas_101_50_17404__6.pdf [file pnas_101_50_17404__6.pdf]
